# Supplementary material for: Pharmacokinetic Analysis of Omomyc Shows Lasting Structural Integrity and Long Terminal Half-Life in Tumor Tissue
Source: MDPI journal article supplement (doi:10.3390/cancers15030826), 2023-01-29
Supplement: s1 [file s1]

Supplementary Materials

A

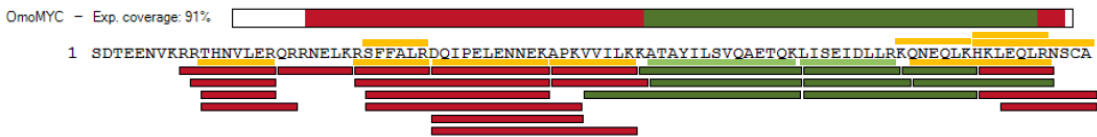

B

1\_Omomyc TEENVKRRTHNVLERQRRNELKRSFFALRDQIPELENNEKAPKVILKKA  
2\_HUMAN\_Homo\_sapiens TEENVKRRTHNVLERQRRNELKRSFFALRDQIPELENNEKAPKVILKKA  
3\_MOUSE\_mus\_musculus TEEN**D**KRRTHNVLERQRRNELKRSFFALRDQIPELENNEKAPKVILKKA  
\*\*\*\* \*  
  
1\_Omomyc TAYILSVQAETQKLISEIDLLRKQNEQLKHKLEQLRN SCA  
2\_HUMAN\_Homo\_sapiens TAYILSVQAEE**Q**KLISE**E**DLLRK**RR**EQLKHKLEQLRN SCA  
3\_MOUSE\_mus\_musculus TAYILSI**Q**A**D**E**H**KL**T**SE**K**DLLRK**RR**EQLKHKLEQLRN S**C**A  
\*\*\*\*\* \*\* \* \* \* \* \*

C

Sequences (1:2) Aligned. Score: 95.5556  
Sequences (1:3) Aligned. Score: 88.8889

**Supplementary Figure S1. Sequence coverage of Omomyc and homology with the bHLHLZ of the MYC protein.** A) Sequence coverage of Omomyc protein obtained from shotgun LC-MS/MS. The peptide sequences detected are marked in green when unique to Omomyc and in red when shared with MYC. B) Sequence alignment between the 91 amino acid bHLH-LZ domain of Omomyc and the mouse and human MYC proteins. Differences in the amino acid sequence in comparison to Omomyc are indicated by yellow boxes. C) Identity score for the alignment of the bHLH-LZ domain among the different species.

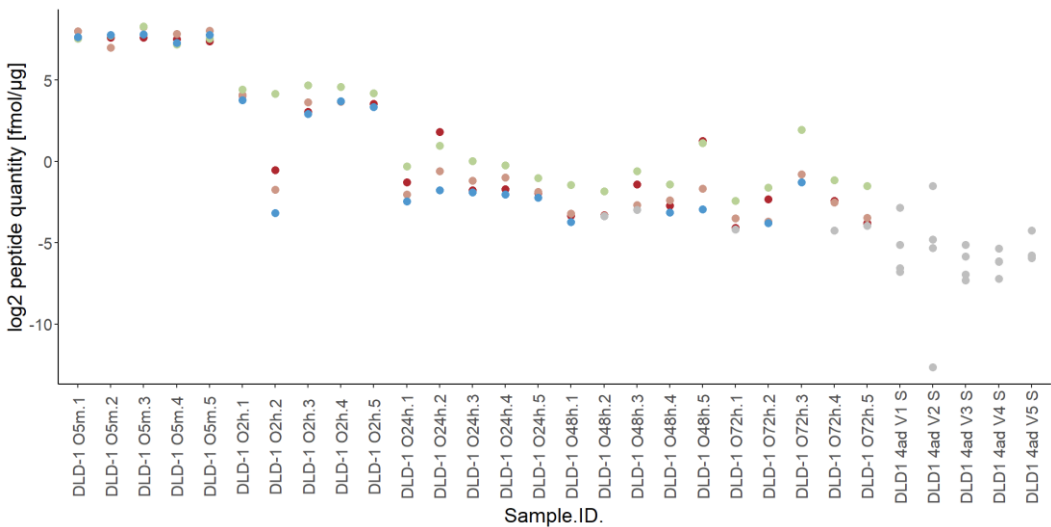

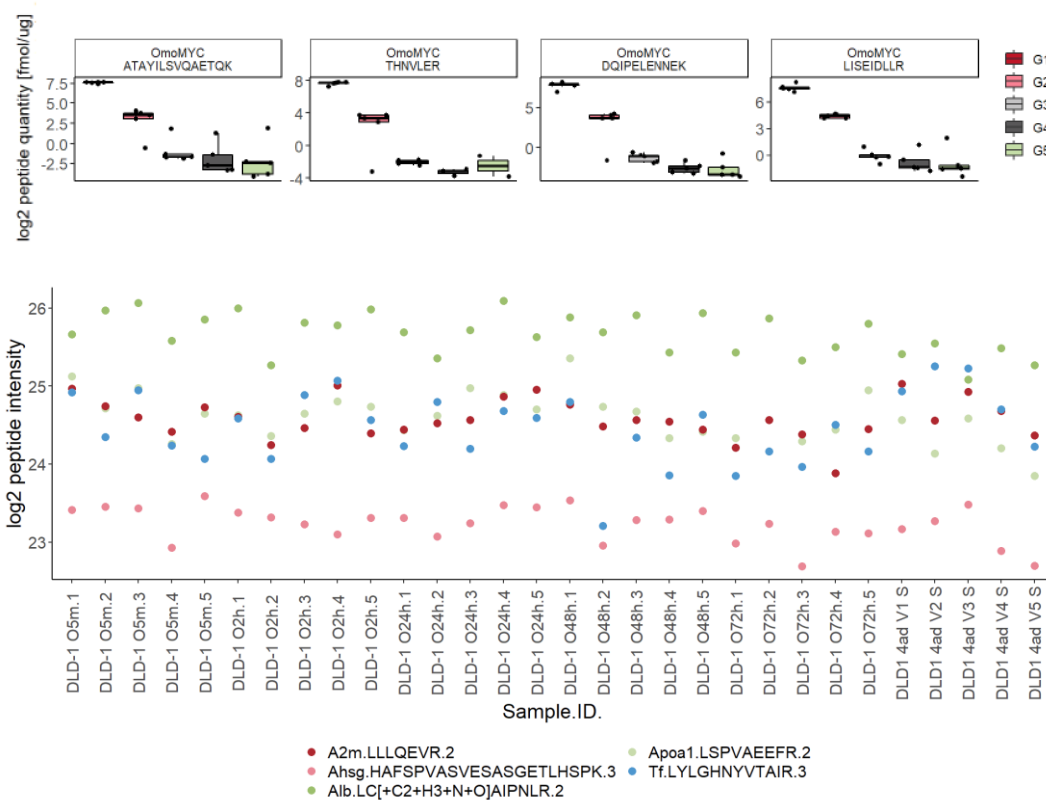

**Supplementary Figure S2. Quantification of the reporter peptides in serum samples.** a) Quantification of Omomyc reporter peptides. Red: ATAYILSVQAETQK, Green: LISEIDLLR, Pink : DQIPELENNEK, Blue: THNVLER). No detection was observed in 5 vehicle-treated samples (grey dots show not detected signals, q-value > 0.01). b) Box plots showing the absolute quantities of all 4 quantified Omomyc peptides. c) Quantification of 5 control proteins.

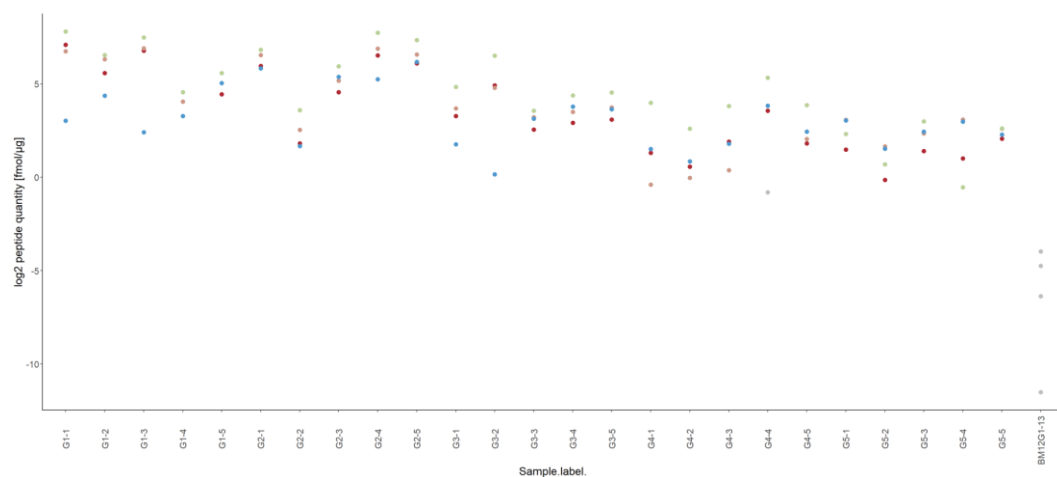

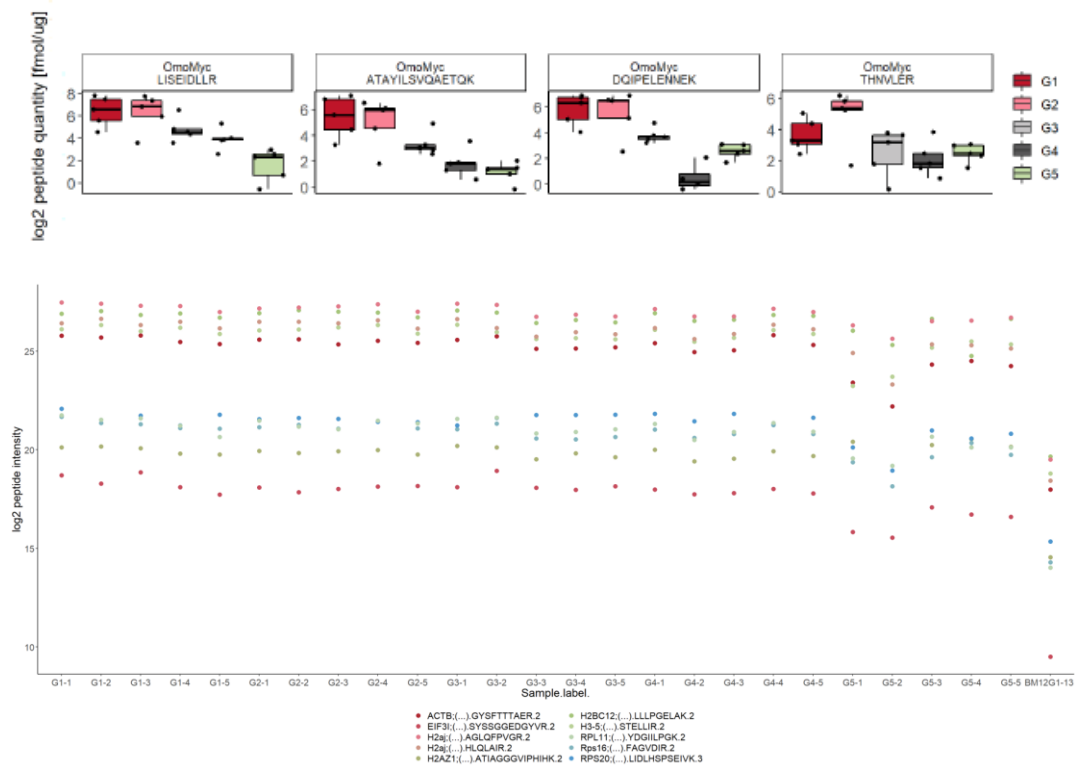

**Supplementary Figure S3. Quantification of the reporter peptides in FFPE samples.** a) Quantification of Omomyc reporter peptides. Red: ATAYILSVQAETQK, Green: LISEIDLLR, Pink : DQIPELENNEK, Blue: THNVLER). No detection was observed in 5 vehicle-treated samples (grey dots show not detected signals, q-value > 0.01). b) Box plots showing the absolute quantities of all 4 quantified Omomyc peptides. c) Quantification of 10 control peptides (corresponding to 9 proteins).

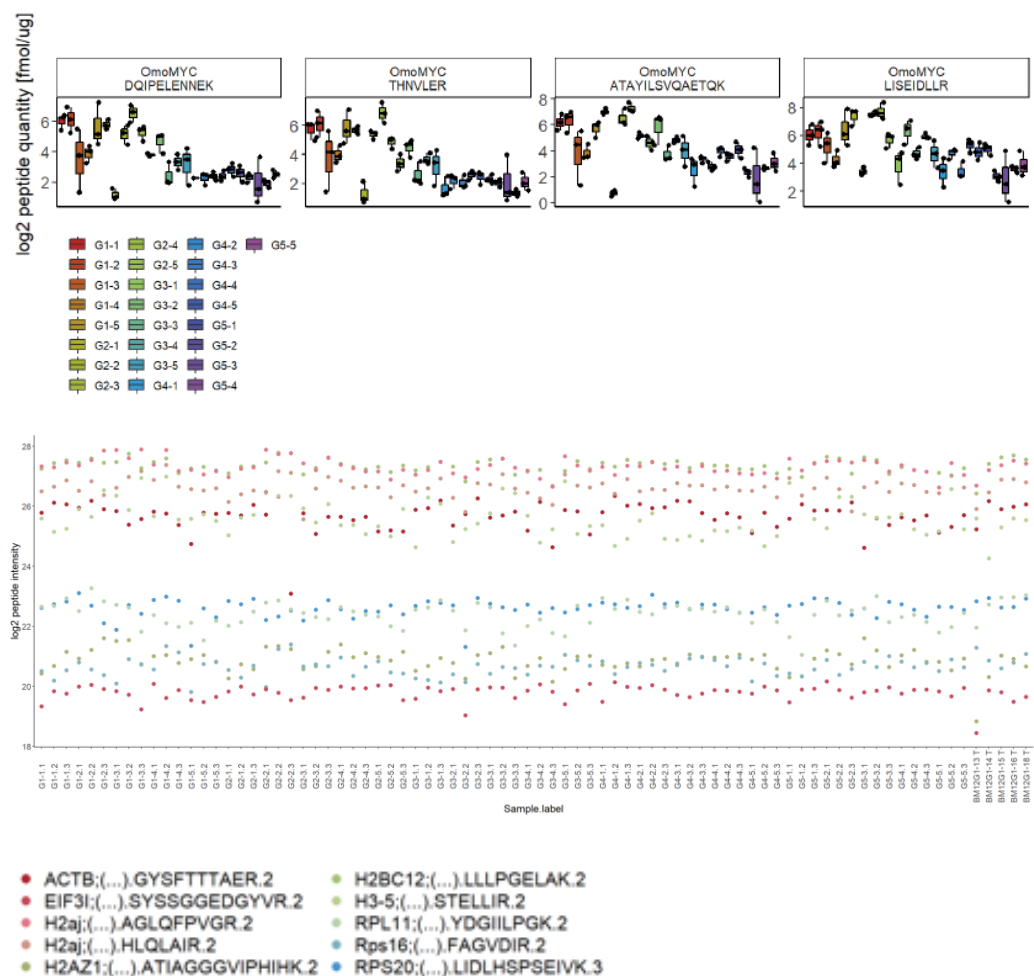

**Supplementary Figure S4. Quantification of the reporter peptides in FF samples.** a) Quantification of Omomyc reporter peptides. Red: ATAYILSVQAETQK, Green: LISEIDLLR, Pink : DQIPELENNEK, Blue: THNVLER). No detection was observed in 5 vehicle-treated samples (grey dots show not detected signals, q-value > 0.01). b) Box plots showing the absolute quantities of all 4 quantified Omomyc peptides. c) Quantification of 10 control peptides (corresponding to 9 proteins).

**Supplementary Table S1.** Peptides identified in the shotgun LC-MS/MS of the Omomyc protein. The sequences selected for testing in LC-PRM are identified.

| #  | Peptide sequence              |
|----|-------------------------------|
| 1  | APKVVILK <sup>1</sup>         |
| 2  | APKVVILKK                     |
| 3  | ATAYILSVQAETQK <sup>1,2</sup> |
| 4  | DQIPELENNEK <sup>1</sup>      |
| 5  | DQIPELENNEKAPK                |
| 6  | DQIPELENNEKAPKVVILK           |
| 7  | HKLEQLR <sup>1</sup>          |
| 8  | HKLEQLRNSCA <sup>1</sup>      |
| 9  | KATAYILSVQAETQK               |
| 10 | KQNEQLK <sup>1</sup>          |
| 11 | LEQLRNSCA                     |
| 12 | LISEIDLLR <sup>1,2</sup>      |

|    |                            |
|----|----------------------------|
| 13 | LISEIDLLRK                 |
| 14 | LISEIDLLRKQNEQLK           |
| 15 | QNEQLKHKLEQLR <sup>1</sup> |
| 16 | QRRNELK                    |
| 17 | RRTHNVLER                  |
| 18 | RSFFALR <sup>1</sup>       |
| 19 | RSFFALRDQIPELENNEK         |
| 20 | RTHNVLER                   |
| 21 | SFFALR <sup>1</sup>        |
| 22 | SFFALRDQIPELENNEK          |
| 23 | SFFALRDQIPELENNEKAPK       |
| 24 | THNVLER <sup>1</sup>       |
| 25 | THNVLERQR                  |
| 26 | VVILKKATAYILSVQAETQK       |

<sup>1</sup> Selected for testing in LC-PRM

<sup>2</sup> SIS peptide available

**Supplementary Table S2.** List of monitored Omomyc and MYC peptides for absolute quantification and control peptides for label free quantification.

| Protein / Gene IDs                                   | Peptide sequence          | Quantification | Matrix   |
|------------------------------------------------------|---------------------------|----------------|----------|
| Omomyc                                               | ATAYILSVQAETQ<br>K        | SIS            | All      |
| Omomyc                                               | DQIPELENNEK               | SIS            | All      |
| Omomyc                                               | LISEIDLLR                 | SIS            | All      |
| Omomyc                                               | THNVLER                   | SIS            | All      |
| MYC                                                  | SSDTEENVK                 | SIS            | All      |
| H2aj;H2AC6;H2AZ1;H2az1;H2az2;H2AZ2(...)              | AGLQFPVGR                 | Label free     | FFPE, FF |
| H2aj;H2AC6;H2AZ1;H2az1;H2az2;H2AZ2(...)              | HLQLAIR                   | Label free     | FFPE, FF |
| H2AZ1;H2az1;H2az2;H2AZ2                              | ATIAGGGVIPHH<br>K         | Label free     | FFPE, FF |
| H2BC12;H2BC11;H2bc7;H2bc14;(...)                     | LLLPGELAK                 | Label free     | FFPE, FF |
| H3-5;H3C1;H3c1;H3c2;H3-3A;H3-3a;H3-4;H3-2;H3-5;H3C15 | STELLIR                   | Label free     | FFPE, FF |
| ACTB;Actb;Actg1;ACTG1                                | GYSFTTTAER                | Label free     | FFPE, FF |
| EIF3I;Eif3i                                          | SYSSGGEDGYVR              | Label free     | FFPE, FF |
| RPL11;Rpl11                                          | YDGIIIPGK                 | Label free     | FFPE, FF |
| Rps16;RPS16                                          | FAGVDIR                   | Label free     | FFPE, FF |
| RPS20;Rps20                                          | LIDLHSPSEIVK              | Label free     | FFPE, FF |
| Alb                                                  | LCAIPNLR                  | Label free     | Serum    |
| Ahsg                                                 | HAFSPVASVESAS<br>GETLHSPK | Label free     | Serum    |
| Apoa1                                                | LSPVAEEFR                 | Label free     | Serum    |
| A2m                                                  | LLLQEVK                   | Label free     | Serum    |
| Tf                                                   | LYLGHNYVTAIR              | Label free     | Serum    |
